1 **OPERANT CONDITIONING OF RECTUS FEMORIS H-REFLEXES: A**  
2 **PROOF-OF-CONCEPT WITH IMPLICATIONS FOR POST-STROKE**  
3 **QUADRICEPS HYPERREFLEXIA**

4

5 Kyoungsoon Kim<sup>1</sup>, Tunc Akbas<sup>2</sup>, Robert Lee<sup>3</sup>, Kathleen Manella<sup>4</sup>, and James Sulzer<sup>1,5</sup>

6 <sup>1</sup>University of Texas at Austin, Austin, TX, USA, <sup>2</sup>Intel Corporation, Hillsboro, OR, USA, <sup>3</sup>St. David's Medical

7 Center, Austin, TX, USA, <sup>4</sup>Nova Southeastern University, Clearwater, FL, USA, <sup>5</sup>MetroHealth Hospital and Case

8 Western Reserve University, Cleveland, OH, USA

9 <sup>5</sup>jss280@case.edu

10

11 **Acknowledgements** We would like to thank the participants for their efforts. We would also like to thank Dr.

12 Amir Eftekhari and Dr. Aiko Thompson for developing Evoked Potential Operant Conditioning System (EPOCS)

13 software and providing helpful guidance.

14

15 **Author contributions** KK: performed the experiment, recruited participants, and analyzed the data, TA: helped

16 with experimental setup, RL: helped with recruitment of post-stroke individuals, KM: helped with experimental

17 design, JS: designed the experiment and supervised data analysis. All authors helped edit the manuscript.

18

19 **Funding** This work was financially supported in part by the NIH/NICHHD (P2CHD086844, Kautz), and JS is the

20 recipient. The contents are solely the responsibility of the authors and do not necessarily represent the official

21 views of the NIH or NICHHD. The funders had no role in study design, data collection and analysis, decision to

22 publish, or preparation of the manuscript.

23

## Declaration

24 **Conflict of interest** The authors have declared that no competing interests exist.

25

26 **Ethics approval** This study was conducted according to the Declaration of Helsinki and had ethical approval  
27 from University of Texas Institutional Review Board. All subjects gave written informed consent prior to data  
28 collection.

29

30 **Data availability** The datasets generated during and/or analyzed during the current study are available from the  
31 corresponding author on reasonable request.

32

## Abstract

33           Hyperreflexia is common after neurological injury such as stroke, yet clinical interventions have had  
34 mixed success. Our previous research has shown that hyperreflexia of the rectus femoris (RF) during pre-swing  
35 is closely associated with reduced swing phase knee flexion in those with post-stroke Stiff-Knee gait (SKG). Thus,  
36 reduction of RF hyperreflexia may improve walking function in those with SKG after stroke. A non-  
37 pharmacological and non-surgical procedure for reducing hyperreflexia has emerged based on operant  
38 conditioning of spinal reflexes elicited using electrical stimulation of the peripheral nerve, known as an H-reflex.  
39 Operant H-reflex conditioning training of the soleus has improved clinical gait function in those with spinal cord  
40 injury. It is currently unknown whether operant conditioning can be applied to the RF or those after stroke. This  
41 feasibility study trained 7 participants (5 neurologically intact, 2 post-stroke) over a period of 3 months, up to 3  
42 times per week, to down-condition the RF H-reflex using visual feedback. We found an overall decrease in average  
43 RF H-reflex amplitude among 7 participants (44% drop,  $p < 0.001$ , paired t-test), of which the post-stroke  
44 individuals contributed (49% drop). We observed a generalized training effect across quadriceps muscles. Post-  
45 stroke individuals exhibited improvements in peak knee-flexion velocity, reflex excitability during walking, and  
46 clinical measures of spasticity. These aforementioned neuromuscular outcomes provide promising initial results  
47 that operant RF H-reflex conditioning is feasible both in healthy and post-stroke individuals. This procedure could  
48 provide a targeted alternative to spasticity management and avoid the drawbacks of drugs and surgery.

49

50 **Keywords** Stiff-knee gait · Hyperreflexia · H-reflex · Operant conditioning · Spasticity · Stroke

51

## Introduction

52

53

54

55

56

57

58

59

60

61

Stiff-Knee gait (SKG) after stroke is a common disability often defined by decreased knee flexion angle during the swing phase of walking (Perry and Burnfield 2010). Those with SKG suffer from joint pain, energy inefficiency and increased risk of falls (Burpee and Lewek 2015). The causes of post-stroke SKG are unclear, although it has been suggested that quadriceps spasticity contributes to SKG (Perry 1992). Our recent work demonstrates this claim, showing an association between hyperreflexia, a component of spasticity, in the rectus femoris (RF) and reduced knee flexion angle in those with post-stroke SKG (Akbas et al. 2020). Hyperreflexia is defined as overactive or overresponsive reflex activity (Lance 1980; Young and Wiegner 1987), possibly resulting from disinhibition of brainstem pathways such as the reticulospinal tract (Li and Francisco 2015; Li et al. 2018). Thus, a reduction of RF hyperreflexia may help restore healthy gait through restoration of spinal inhibitory pathways in those with post-stroke SKG.

62

63

64

65

66

67

68

69

70

71

72

73

Various pharmacological and surgical interventions have been used to treat quadriceps spasticity. Botulinum neurotoxin (BoNT) injection blocks neurotransmitter release at the neuromuscular junction, resulting in increased range of motion (ROM) in the knee joint angle (Robertson et al. 2009; Roche et al. 2015). BoNT injections alleviate hyperreflexia (Stoquart et al. 2008; Robertson et al. 2009; Roche et al. 2015), but also weaken the quadriceps throughout the gait cycle, resulting in limited clinical benefit in those with SKG (Stoquart et al. 2008; Wissel et al.). Surgical interventions such as tendon transfer surgery is also possible, but there is limited evidence for clinical effectiveness (Platz 2021). Baclofen, a gamma-Aminobutyric acid (GABA) agonist, is the most common oral treatment for spasticity, however its effectiveness is questionable and results in side effects such as sedation (Dehnadi Moghadam et al. 2021; Navarrete-Opazo et al. 2016). Baclofen is more effective when administered intrathecally in a targeted manner (Kofler et al. 2009; Dvorak et al. 2011), however it may negatively affect compensatory motor systems and requires a surgical implant with regular maintenance. While pharmacological and surgical interventions for hyperreflexia exist, they all have significant drawbacks.

74

75

76

77

78

A possible new non-pharmacological, non-surgical procedure could help target hyperreflexia using operant conditioning. Operant conditioning is a type of associative learning process through which the strength of a behavior is modified by reinforcement or punishment (Skinner 1951). Operant H-reflex conditioning allows the patient to self-modulate his/her own monosynaptic spinal reflex activity elicited via constant current electrical stimulation of a peripheral nerve (i.e. H-reflex) (Thompson et al. 2009). The typical procedure involves visual

79 feedback of H-reflex amplitude while the participant operantly learns how to control the feedback signal over  
80 many training sessions. Initial work in animal models shows that operant H-reflex conditioning can modulate  
81 descending activity of the corticospinal tract and thereby induce spinal cord plasticity that restores altered motor  
82 function (Wolpaw et al. 1983; Wolpaw and Lee 1987; Chen and Wolpaw 1995). At present, operant H-reflex  
83 conditioning has shown that individuals with spinal cord injury can learn to self-modulate soleus reflex  
84 excitability, inducing plasticity at the spinal level (Manella et al. 2013; Thompson et al. 2013; Thompson and  
85 Wolpaw 2021). Further, the ability to operantly condition soleus H-reflex correlates with improvements in  
86 walking speed, locomotor symmetry, locomotor EMG activity, and H-reflex modulation during locomotion. For  
87 instance, Thompson and colleagues (2013) found that some people with SCI can operantly down-condition the  
88 soleus H-reflex to a degree comparable to neurologically intact individuals. Manella et al. (2013) found people  
89 with motor-incomplete SCI can modulate reflex excitability through operant conditioning in both directions  
90 (up/down) on agonist/antagonist pair (tibialis anterior/soleus). This training resulted in improved walking function  
91 on a group level. While operant H-reflex conditioning shows promise for addressing hyperreflexia, it is unclear  
92 whether quadriceps H-reflex can be successfully trained, and further, whether those post-strokes can down-  
93 condition reflex excitability given potential damage to the corticospinal tract (Chen et al. 2002).

94 In this study, our goal was to examine the feasibility of operant down-conditioning of the RF H-reflex in  
95 a pilot cohort of both healthy and post-stroke individuals. We adapted an operant H-reflex conditioning protocol  
96 from previous work which focused on regulating soleus H-reflex and targeted the femoral nerve instead of the  
97 tibial nerve to innervate the quadriceps. We presented visual feedback of the electrically evoked RF H-reflex,  
98 which appeared as a bar graph. Participants were asked to reduce the bar height below a given threshold and were  
99 provided a running score of performance. The experiment consisted of 6 baseline sessions without feedback and  
100 24 feedback training sessions, 2-3 sessions per week over a 3-month period. We expected down-regulation of RF  
101 H-reflex would be feasible in both healthy and post-stroke individuals. This study represents a novel paradigm in  
102 quadriceps spasticity management. This intervention could lead to a targeted, non-pharmacological and non-  
103 invasive treatment for hyperreflexia.

104

105

## Methods

106

### SUBJECTS

107

A total of 7 participants (5 unimpaired [H1-H5], 2 post-stroke [S1-S2]) were recruited for this study. The

108

participants were four men and three women aged 20-68, where two of the individuals had history of stroke (**Table**

109

**1**). Each participant was able to stand for 10-minute intervals unassisted, walk on a treadmill for 10-minutes, and

110

provide informed consent. Exclusion criteria included: lower limb musculoskeletal injury, functionally relevant

111

weight-bearing restrictions, cognitive impairment, vision impairment and must not have taken antispasmodic

112

medication one day prior to the session. All seven people participated in down-conditioning. The study was

113

approved by the University of Texas Institutional Review Board, and all subjects gave informed consent prior to

114

participation. To prevent diurnal variation in H-reflex magnitude (Carp et al. 2006), all training was performed at

115

the same time of the day for each individual. Both post-stroke individuals had right hemiparesis and the

116

experiment was conducted on the impaired side.

| Subject                              |             | S1                                       | S2                              |
|--------------------------------------|-------------|------------------------------------------|---------------------------------|
| <b>Age</b>                           |             | 50's                                     | 60's                            |
| <b>Gender</b>                        |             | M                                        | F                               |
| <b>Years post-stroke</b>             |             | 4                                        | 1                               |
| <b>Type of stroke</b>                |             | Ischemic (Embolic)                       | Hemorrhagic                     |
| <b>Location of stroke</b>            |             | Left Middle Cerebral Artery              | Left Basal ganglia              |
| <b>Modified Ashworth Score (MAS)</b> | <b>Pre</b>  | <b>3</b> (Knee extensor)                 | <b>1+</b> (Knee extensor)       |
|                                      |             | <b>2</b> (Knee flexor)                   | <b>0</b> (Knee flexor)          |
|                                      |             | <b>3</b> (Ankle plantarflexor)           | <b>1+</b> (Ankle plantarflexor) |
|                                      | <b>Post</b> | <b>2</b> (Knee extensor)                 | <b>0</b> (Knee extensor)        |
|                                      |             | <b>2</b> (Knee flexor)                   | <b>0</b> (Knee flexor)          |
|                                      |             | <b>1+</b> (Ankle plantarflexor)          | <b>1+</b> (Ankle plantarflexor) |
| <b>Assistive device</b>              |             | - Customized AFO                         | - Cane, AFO, Wheelchair         |
| <b>Other complications</b>           |             | - Aphasia<br>- Mild cognitive impairment |                                 |

117 **Table 1** Clinical information of post-stroke participants. Years post-stroke is the duration from the date of stroke  
118 to the beginning of the training. Modified Ashworth Score (Bohannon and Smith 1987) was measured by the  
119 clinician before and after training. Both participants received therapy outside their experimental participation.  
120 MAS Key: 0=no increase in tone, 1=slight increase in tone (catch/release at end ROM), 1+= slight increase in  
121 tone, (catch/release at ½ ROM with resistance to end ROM, 2=more marked increase in tone through ROM,  
122 passive movement easy, 3=considerable increase in tone, passive movement difficult, 4=affected part in rigid  
123 flexion or extension.

124           **DATA COLLECTION**

125           The experimental setup consisted of 8-channel surface electromyography (EMG) sensors (AMT-8,  
126 Bortec, Calgary, AL), bipolar electrodes (Ag-AgCl, Noraxon, Scottsdale, AZ) a constant current electrical  
127 stimulator (Digitimer DS8R, Hertfordshire, UK), a data acquisition board (NI-PCIe 6321, Austin, TX), a desktop  
128 computer, and EPOCS software (Devetzoglou Toliou 2020) (**Fig 1**). Additionally, during assessment sessions,  
129 stroke subjects walked on an instrumented split-belt force treadmill (Bertec, Columbus, OH), during which the  
130 ground reaction forces (GRF) were recorded at 1kHz, and lower limb kinematic data were recorded via inertial  
131 motion capture (IMU, Xsens, Enschede, Netherlands) at 60Hz.



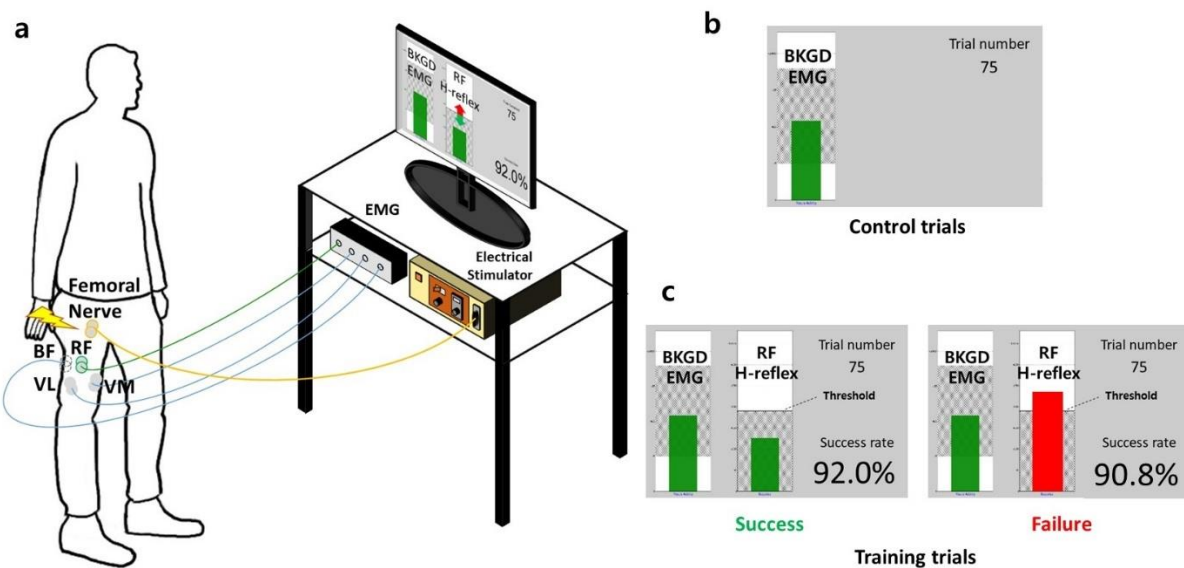

132

133 **Fig 1 Experimental setup and visual feedback of RF operant H-reflex conditioning.**

134 (a) Participant with electrodes on the right leg is in the upright standing posture, facing visual feedback from a  
135 computer monitor. (b) During the control session, only the background EMG level of the RF was provided on the  
136 left bar graph. If the background EMG level was within the shaded region and medial hamstring (MH) activity  
137 was within a predetermined window, the bar remained green and the electrical stimulation was delivered.  
138 Otherwise, the bar turned red with no stimulation or trial progression. (c) During the training session, along with  
139 control session's visual feedback, RF H-reflex size and cumulative success rate were provided. The bar turned  
140 green if the RF H-reflex was below the threshold and turned red if larger than the threshold.

141                   **EXPERIMENTAL PROTOCOL**

142                   The experimental protocol consisted of the preparation stage, femoral nerve navigation, recruitment  
143 stage, 6 baseline sessions, 24 training sessions, and an additional 2 assessment sessions (pre/post) only for the  
144 post-stroke individuals. The experimental sessions occurred 3 times per week over a 12-week period for each  
145 individual, where each session lasted 1-1.5 hrs. Each session consisted of preparation, navigation, recruitment,  
146 and stimulation stages. The preparation stage started with drawing a grid on a surface of the femoral triangle on  
147 the leg. The femoral nerve was identified using an anatomical landmark-based method known as the “four-three  
148 finger technique” (Vloka et al. 2018). Surface EMG electrodes were applied over the muscle belly of the rectus  
149 femoris (RF), medial hamstring (MH), vastus medialis (VM), and vastus lateralis (VL) based on commonly used  
150 anatomical landmarks (Kasman and Wolf 2002; Bordlee and Wong 2015). RF was the primary focus for H-reflex  
151 monitoring, MH was monitored for antagonist activity, and VM and VL were monitored to validate the training  
152 specificity of the RF H-reflex conditioning. EMG activity was amplified, bandpass filtered (10-1000Hz), and  
153 sampled at 1kHz.

154                   During the femoral nerve navigation, the optimal stimulation location of the femoral nerve was  
155 established via a monopolar probe electrode to each point on the grid drawn on the femoral triangle (Knikou  
156 2006). Electrical stimulation was delivered as a square stimulus pulse, 1 ms in duration, intensity ranging between  
157 10-20 mA or above depending on the individual, to elicit a reflex response with the subject in quiet standing. We  
158 monitored the time-course of the reflex response. The H-reflex was determined as the peak response following  
159 the initial stimulus artifact (<3 ms), and M-wave (~10-25 ms), typically within 30-40 ms post-stimulus. We used  
160 the following criteria to identify the optimal H-reflex response: 1) a clear sinusoidal shape, 2) a clear distinction  
161 from the M-wave or sinusoidal signal lies on the downward slope of the M-wave in case of contamination, and 3)  
162 largest signal magnitude of all the candidate spots. After the optimal stimulation spot was located, the monopolar  
163 probe was replaced with a disposable Ag/AgCl snap electrode (circular, 1cm diameter) and the anode electrode  
164 (square 5x5cm) was placed over the surface of gluteus maximus (GMax) on the ipsilateral side. To avoid session-  
165 to-session variability in the electrodes’ locations, the positions of all electrodes were marked using semi-  
166 permanent surgical skin marker. After electrodes were placed, RF maximum voluntary contraction (MVC) was  
167 measured. Participants were asked to sit on a chair with their ankle fastened with a belt to the leg of the chair and  
168 knee flexed to 90°. The investigator asked the participants to extend their knee with maximum effort for 5-7

169 seconds. The participant repeated this three times with 15 seconds intervals in between. The representative MVC  
170 was determined as mean of three MVC trials and was used to determine the inactive window (15% MVC) for the  
171 RF background EMG.

172 During the recruitment stage, the RF H-reflex recruitment curve was achieved while the subject was in  
173 a quiet standing posture. Electrical stimulation with a fixed interval (7 sec) was delivered, only if the background  
174 EMG level of these two muscles were below a predetermined threshold of 15% MVC (Pierrot-Deseilligny and  
175 Burke 2005). Stimulation intensity was gradually increased by 2mA increments from 10mA to the intensity when  
176 the RF M-wave amplitude was the same for three successive trials (Palmieri et al. 2004). For each stimulus  
177 intensity, two stimulations were recorded and the mean of two H-reflexes was taken as representative reflex size.  
178 The corresponding intensity ( $I_{max}$ ) that elicited maximal representative H-reflex ( $H_{max}$ ) was used in the following  
179 trials. Compared to a distal muscle, such as the soleus muscle, the RF H-reflex is often affected by overlap of the  
180 M-wave. This overlap makes it difficult to isolate the H-reflex. To address this issue, we used the best decaying  
181 exponential fit beginning at the peak of the concurrent M-wave and ending at the zero crossing, then subtracted  
182 from the measured signal to obtain the H-reflex estimate (Akbas et al. 2020).

183 During the baseline/training sessions, surface electromyographic (EMG) activity was amplified,  
184 bandpass filtered (3-3000Hz), and recorded from four muscles (RF, MH, VM, and VL), while the femoral nerve  
185 was stimulated with the pre-determined intensity ( $I_{max}$ ) at a frequency of 0.14Hz. Every 100ms post-stimulation,  
186 peak-to-peak magnitude EMG activity was measured, and the result was provided as visual feedback to the  
187 participant. As shown in **Fig 1c**, visual feedback consisted of 1) RF and MH background EMG (left bar), 2) RF  
188 H-reflex (right bar), 3) trial number, and 4) cumulative success rate. The left bar was green if the background  
189 EMG was below activation threshold but was red otherwise. The goal for the participant was to reduce the height  
190 of the right bar, representing H-reflex amplitude, below a given threshold (shaded area in **Fig 1c**). If below the  
191 performance threshold, the right bar turned green and cumulative success rate was adjusted accordingly. If above  
192 the threshold, the bar turned red and success rate fell. Each trial was 7 s duration, with stimulation of 1ms pulse  
193 width followed by feedback for the remainder of the trial. The 6 baseline sessions each consisted of 3 runs of 75  
194 control trials (225 total), while each of 24 training sessions consisted of 20 control trials and 3 runs of 75 training  
195 trials (245 total) in standing posture. Subjects were exposed to H-reflex feedback only during the training trials,  
196 and no H-reflex feedback was given during the control trials. The participant's score for each run was cumulative

197 success rate ( $Scr = \frac{N_{success}}{N_{trial}} \%$ ) and participants were rewarded in proportion to one's score (i.e.,  $Reward(\$) =$   
198  $1.0 + 0.05 * (Scr - 50)$ ). If the participant was successful in achieving three consecutive success rates that were  
199 equal to or higher than 90% for all three runs, they were provided with an extra dollar as bonus, which made the  
200 maximum additional compensation amount \$10.00. A rest period was provided between each run to minimize  
201 fatigue, which could affect muscular responses to stimuli (Crone et al. 1999; Stutzig and Siebert 2017).

202 The two individuals with stroke participated in pre/post assessment sessions. Participants performed a  
203 10 m walk test (10MWT) with instructions to walk with maximum effort for 10 m. This process was repeated for  
204 4 times and the participant's gait kinematics were recorded using inertial motion capture. Next, participants  
205 completed the quadriceps pendulum test, which is a non-invasive biomechanical method of evaluating spasticity  
206 using gravity to provoke muscle stretch reflexes during passive swinging of the lower limb (Fowler et al. 2007).  
207 Inertial measurement units were attached on top of thigh, shank, and foot to calculate the knee joint angle during  
208 the process. This test was repeated 3 times with 30 second rest periods in between. The main outcome of this test  
209 was quadriceps reflex threshold angle (QRTA), which was the angle difference from the maximum knee extension  
210 position to the first swing excursion, the first transition period of knee flexion to knee extension. Third, the  
211 participant was asked to walk on an instrumented treadmill while their gait kinematics, ground reaction forces  
212 (GRF), and H-reflexes were obtained. During treadmill walking, four gait phases (heel-strike, toe-off, mid-stance,  
213 and mid-swing) were detected in real-time using online GRF data. The H-reflex was elicited and measured only  
214 when a desired gait phase was detected and occurred at least 7 seconds after the last H-reflex trial. Twenty H-  
215 reflexes were recorded for each gait phase. A 5-minute break after each of four runs was provided to minimize  
216 the effect of fatigue on H-reflex. The main outcomes consisted of 1) knee flexion range of motion (RoM), 2) peak  
217 knee flexion velocity, and 3) H-reflex amplitude during the four different gait phases.

218           **OUTCOME MEASURES**

219           We normalized the H-reflex measurements. For each session, the H-reflex was normalized with the  
220 session's maximum motor response (M-wave,  $M_{max}$ ), which is the most commonly used method of normalization  
221 (Hopkins and Ingersoll 2000). To directly compare between session-to-session performances, each session's H-  
222 reflex trial was averaged and represented as the percentage of the mean of six baseline session's H-reflex. Main  
223 outcome measures of each session were the average of 225 peak-to-peak H-reflex trials normalized to  $M_{max}$  and  
224 baseline mean. Control trials, which were conducted without feedback in the beginning of each training session,  
225 provide a window into long-term plasticity of H-reflex excitability. For each session, we compared the mean  
226 amplitude of 20 control H-reflex trials, which were normalized to the  $M_{max}$  and baseline mean.

227                    **TRAINING SPECIFICITY OF OPERANT H-REFLEX CONDITIONING**

228                    Exploring training specificity of operant H-reflex conditioning can provide evidence that the training can  
229 be targeted for a specific muscle, which in this study was the RF. During the experiment, only RF H-reflex visual  
230 feedback was provided to the subject while two adjacent quadriceps muscles (VM and VL) were recorded without  
231 being visualized by the participant. Since VM and VL share motor innervation with RF through a branch of  
232 femoral nerve, we investigated whether the shared nerve root of the quadriceps would project a broader training  
233 effect on the quadriceps. H-reflexes of VM and VL were processed in a similar way as RF; each sessions' H-  
234 reflex trials were averaged, normalized by  $M_{max}$ , and represented as percentage (%) of 6 baseline sessions' mean.

235                    **STATISTICAL ANALYSIS**

236                    We investigated the hypothesis that RF H-reflex can be down-conditioned through operant H-reflex  
237 conditioning both in healthy and post-stroke individuals. To validate the effect of training, a paired t-test ( $\alpha < 0.05$ )  
238 was used to compare the mean of the 225 normalized H-reflex trials during six baseline sessions to that of the last  
239 six training sessions (**Fig 2**). We used a linear mixed model to evaluate any spontaneous change in H-reflex during  
240 baseline, where session number was set as a fixed effect and subject number as random effect. Further, we  
241 hypothesized RF operant H-reflex conditioning may be targeted to the RF muscle and would not affect other  
242 adjacent muscles (VM and VL) using paired t-tests. We compared control H-reflex trials of conditioning sessions  
243 to that of baseline sessions to examine the long-term effect of training (Thompson et al. 2009) using a paired t-  
244 test.

245                    For post-stroke individuals, we compared quadriceps reflex threshold angle (QRTA) as a quantitative  
246 measure of spasticity, knee joint kinematics, and the H-reflex amplitude during four gait phases (heel-strike, toe-  
247 off, mid-stance, and swing) before and after the training using a paired t-test.

248

## Results

249

### RF OPERANT H-REFLEX CONDITIONING

250

All participants exhibited the ability to down-regulate RF H-reflex through training. **Table 2** presents the mean

251

response of the healthy participants and individual responses of the two post-stroke participants. Because

252

performance of post-stroke individuals was not significantly different than healthy individuals, the data was

253

pooled for subsequent analyses. There was no spontaneous decrease in H-reflex amplitude during baseline

254

sessions ( $F = 0.53, p = 0.47$ ), compared to the training sessions ( $F = 27.18, p < 0.0001$ ). We observed a decrease

255

in H-reflex amplitude when comparing the last 6 training sessions with the 6 baseline sessions ( $43.82 \pm 4.81\%$

256

mean $\pm$ SE,  $p < 0.0001$ ). **Fig 2** illustrates the summary statistics of H-reflex amplitude of 7 participants over each

257

session.



| Subject        | Muscle    | Conditioned H-reflex (% baseline) |
|----------------|-----------|-----------------------------------|
| <b>H1 – H5</b> | <b>RF</b> | 58.37±2.91 (***)                  |
|                | VM        | 52.46±3.44 (***)                  |
|                | VL        | 71.74±6.87 (*)                    |
| <b>S1</b>      | <b>RF</b> | 46.87±5.59 (*)                    |
|                | VM        | 74.62±10.09 (ns)                  |
|                | VL        | 70.89±10.55 (*)                   |
| <b>S2</b>      | <b>RF</b> | 54.56±3.88 (*)                    |
|                | VM        | 17.34±9.27 (**)                   |
|                | VL        | 14.58±0.92 (**)                   |

258 **Table 2 Summary of results based on neurological condition.** Values represent mean±SE and are expressed as  
259 the percentage of baseline H-reflex mean. The table shows the significant differences from the six baseline  
260 sessions' H-reflex (\* p<0.05, \*\*p<0.01, \*\*\*p<0.001)

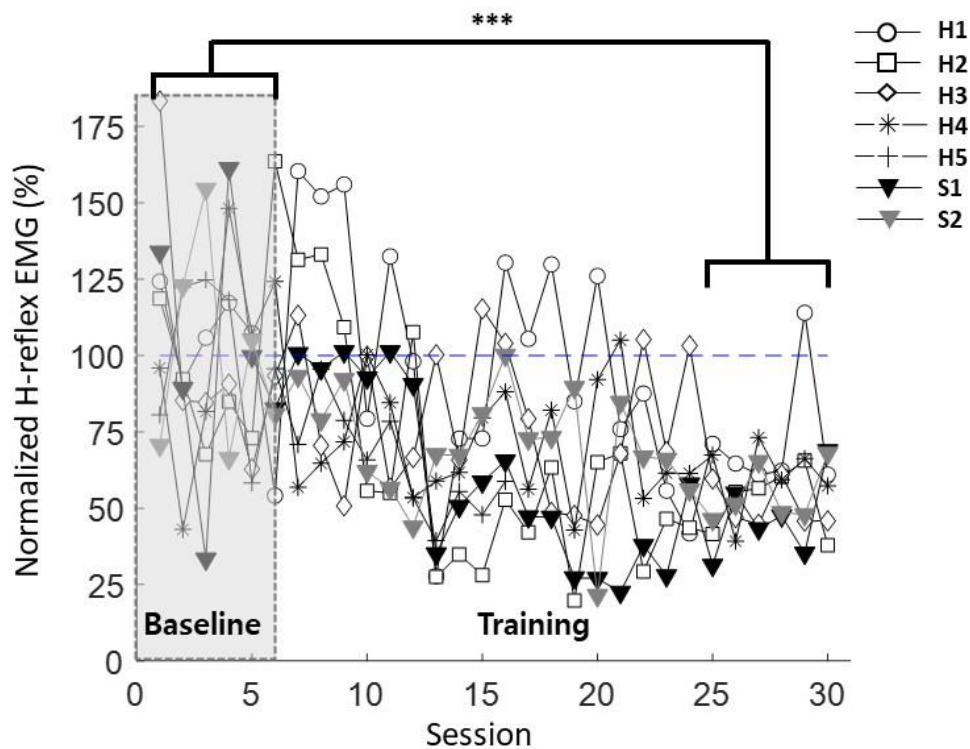

261

262 **Fig 2 H-reflex magnitude change in RF over training.**

263 Shaded area indicates the baseline sessions and blank area indicates training sessions. Each marker represents the

264 individuals' (H1-H5, S1-S2) RF H-reflex means for each session. (\* p<0.05, \*\*p<0.01, \*\*\*p<0.001)

265 **LONG-TERM EFFECT OF CONDITIONING ON THE CONTROL H-REFLEX SIZE**

266 Consolidation of H-reflex down-conditioning following training can be observed in the first 20 control  
267 (no feedback) trials of each session. **Fig 3** shows the time-course change of the control RF H-reflex for all  
268 participants. For the control trials (i.e., no feedback) of all 7 individuals, the change between baseline and the last  
269 6 training sessions was ( $20.86 \pm 5.77\%$ , mean $\pm$ SE,  $p < 0.01$ ).

270

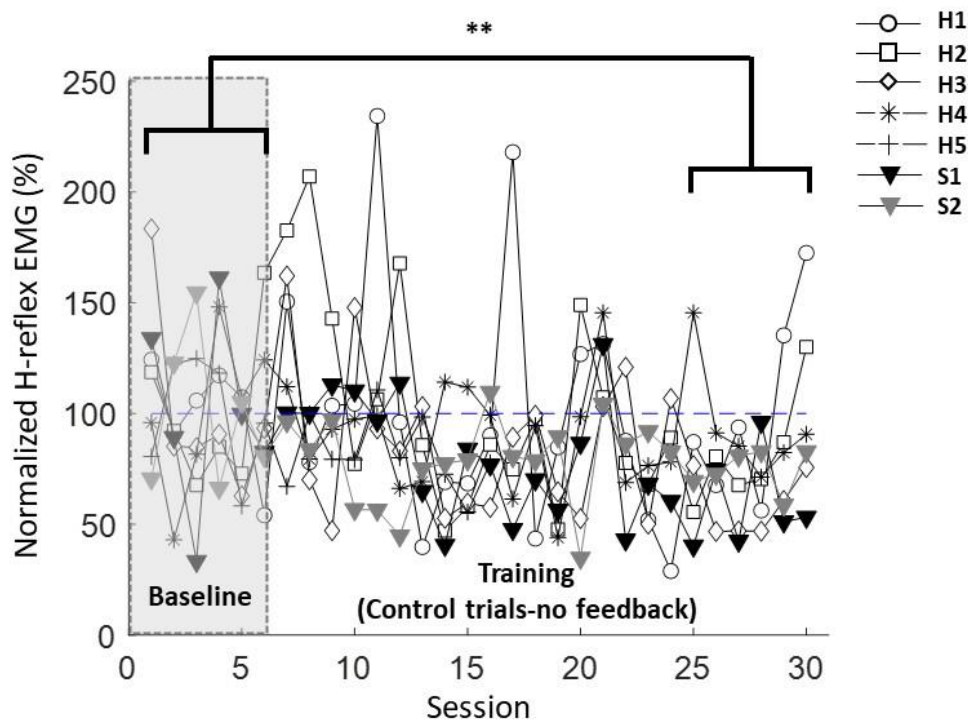

271

272 **Fig 3 H-reflex magnitude change among control trials shows long-term effect of the training.** Data during  
273 training phase extracted from 20 control trials prior to introduction of feedback for each session. Each marker  
274 represents the individuals' (H1-H5, S1-S2) control RF H-reflex means for each session. (\*  $p < 0.05$ , \*\*  $p < 0.01$ ,  
275 \*\*\*  $p < 0.001$ )

276                    **TRAINING SPECIFICITY OF RF OPERANT H-REFLEX CONDITIONING:**  
277                    **COMPARISON WITH VM AND VL**

278    The femoral nerve innervates all four quadriceps muscles, but feedback is only provided from one muscle, raising  
279    a question of muscle training specificity. Performance of healthy individuals separate from post-stroke individuals  
280    can be seen in **Table 2**. For healthy individuals, H-reflex decreased significantly for both VM and VL, whereas  
281    mixed result was monitored among post-stroke individuals. We pooled these results in **Fig 4** for VM ( $49.16 \pm$   
282     $5.42\%$  (SE) drop,  $p < 0.0001$ ) and VL ( $37.24 \pm 7.37\%$  (SE) drop,  $p < 0.001$ ), respectively.

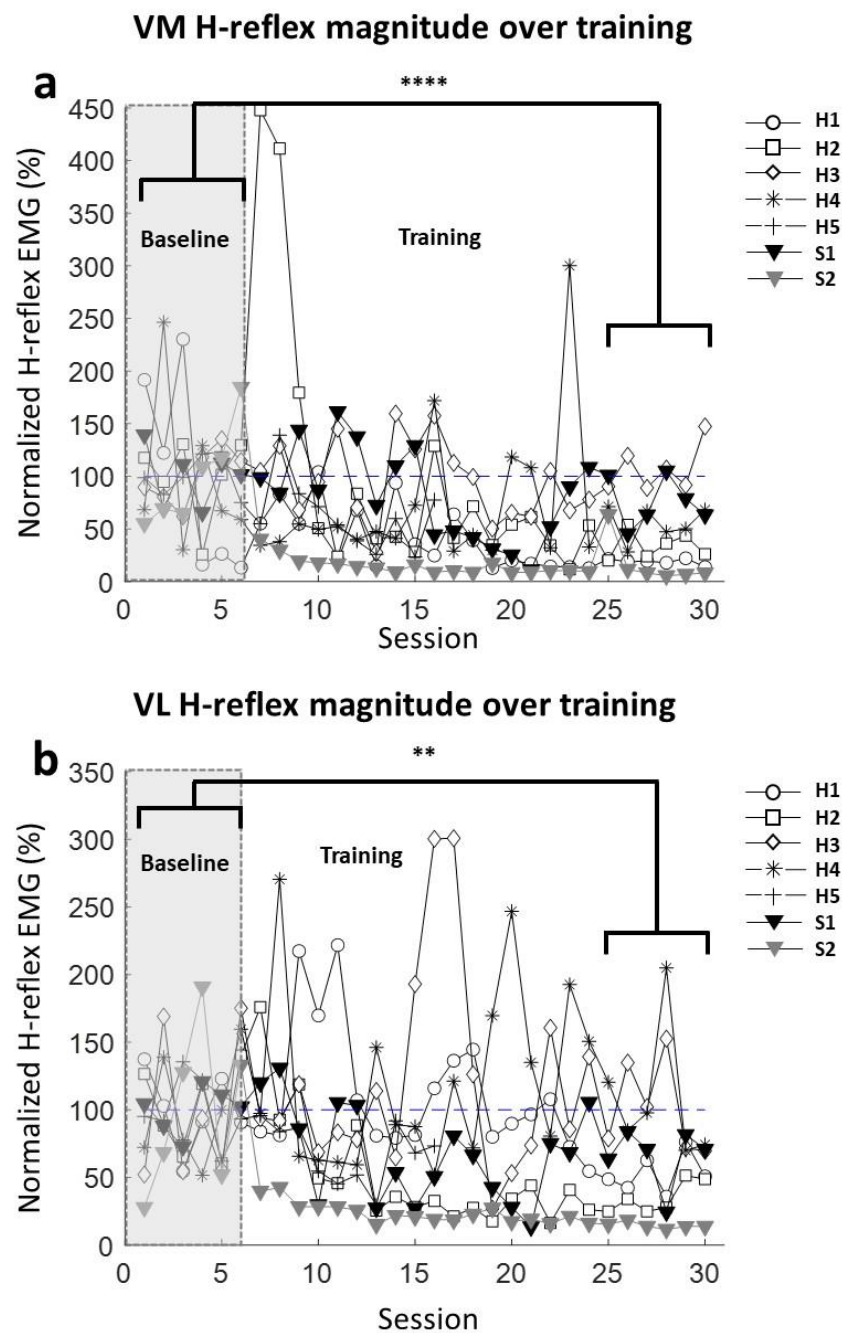

283

284 **Fig 4 Muscle training specificity of RF Operant H-reflex Conditioning in VM (a) and VL (b) in all**

285 **participants.** Shaded area indicates the baseline sessions and blank area indicates training sessions. Each

286 marker represents the individuals' (H1-H5, S1-S2) VM and VL H-reflex means for each session. (\*  $p < 0.05$ ,

287 \*\* $p < 0.01$ , \*\*\* $p < 0.001$ , \*\*\*\* $p < 0.0001$ )

288 **BEHAVIORAL EFFECT OF THE RF OPERANT H-REFLEX CONDITIONING IN POST-**  
289 **STROKE INDIVIDUALS**

290 We conducted a pre/post behavioral assessment on the two post-stroke individuals. Knee flexion RoM  
291 and peak knee flexion velocity significantly improved both during overground and treadmill walking for S1.  
292 However, for S2, the improvement in knee flexion kinematics was limited to RoM during overground walking.  
293 **Table 3** illustrates the results. Quadriceps spasticity, quantified as QRTA, improved in S1 by 10.55° ( $p=0.016$ ),  
294 while S2 had a statistically insignificant change of 3.50° ( $p = 0.536$ ). Reflex modulation (**Table 3**) for S1  
295 improved significantly for all four gait phases, where the mean reduction was 19.21%. In S2, H-reflex excitability  
296 decreased significantly in three gait phases (heel-strike, toe-off, and mid-stance), with a mean decrease of 23.4%.

| Subject                    | Measurement                |                     |                 |                    |
|----------------------------|----------------------------|---------------------|-----------------|--------------------|
|                            | QRTA (deg)                 | Pre-assess          | Post-assess     |                    |
| S1                         |                            | 32.47±3.47          | 42.92±2.96 (**) |                    |
|                            | <b>Knee flexion</b>        |                     |                 |                    |
|                            | RoM (deg)                  | (Overground)        | 12.27±0.36      | 14.40±0.26 (****)  |
|                            |                            | (Treadmill)         | 6.57±0.40       | 10.10±0.39 (****)  |
|                            | Pk vel. (deg/s)            | (Overground)        | 226.83±4.54     | 264.64±5.81 (****) |
|                            |                            | (Treadmill)         | 138.01±6.73     | 190.59±5.95 (****) |
|                            | <b>Gait phase H-reflex</b> |                     |                 |                    |
|                            |                            | Heel-strike         | 33.63±0.92      | 19.68±0.52 (****)  |
|                            |                            | Toe-off             | 47.44±2.94      | 17.41±0.76 (****)  |
|                            |                            | Mid-stance          | 31.69±2.38      | 18.97±0.42 (****)  |
|                            |                            | Mid-swing           | 37.05±2.87      | 16.89±0.60 (****)  |
|                            | S2                         |                     | 41.81±0.7       | 45.31±5.18 (ns)    |
|                            |                            | <b>Knee flexion</b> |                 |                    |
|                            |                            | RoM (deg)           | (Overground)    | 44.59±0.77         |
| (Treadmill)                |                            |                     | 46.15±1.13      | 46.53±1.20 (ns)    |
| Pk vel. (deg/s)            |                            | (Overground)        | 154.46±6.69     | 179.38±18.78 (ns)  |
|                            |                            | (Treadmill)         | 146.93±9.36     | 140.22±6.28 (ns)   |
| <b>Gait phase H-reflex</b> |                            |                     |                 |                    |
|                            |                            | Heel-strike         | 96.27±6.56      | 60.28±4.42 (****)  |
|                            |                            | Toe-off             | 102.65±5.58     | 68.63±1.11 (****)  |
|                            |                            | Mid-stance          | 80.43±2.45      | 54.71±2.76 (****)  |
|                            |                            | Mid-swing           | 78.95±11.09     | 81.66±3.95 (ns)    |

297 **Table 3 Behavioral effect on gait kinematics**

298 Values represent mean±SE of Quadriceps Reflex Threshold Angle (deg), knee flexion RoM (deg), and peak-

299 velocity (deg/s) during overground (10MWT) walking and treadmill walking. The table shows the significant  
300 differences between the pre-assessment and post-assessment session (\*  $p < 0.05$ , \*\* $p < 0.01$ , \*\*\* $p < 0.001$ ,  
301 \*\*\*\* $p < 0.0001$ )



302

## Discussion

303           The goal of this study was to investigate the feasibility of self-modulation of RF H-reflex excitability.  
304       We trained 7 individuals (5 healthy and 2 post-stroke), over 24 sessions. Our results provided the first evidence  
305       that RF H-reflex can be down-regulated, and we did not observe any decrement in ability to self-regulate in 2  
306       post-stroke individuals. The down-regulation of RF generalized to other quadriceps muscles (VM and VL). The  
307       2 post-stroke individuals exhibited improvements in reflex modulation generalized over the gait cycle and gait  
308       performance. We conclude that RF H-reflex down-conditioning is feasible and its effects should be evaluated in  
309       a controlled clinical trial.

310           Our findings suggest that individuals were successful in down-regulating their RF H-reflex via operant  
311       H-reflex conditioning. Comparing the H-reflex amplitude in the six baseline sessions to the last six training  
312       sessions resulted in a 42% drop in healthy individuals, 49% drop for the two post-stroke individuals, and 44%  
313       drop across all 7 individuals. Previous animal model research indicated that CST transmission was critical for  
314       operant H-reflex learning (Chen et al. 2002) suggesting that those with reduced CST integrity resulting from  
315       stroke may not be able to learn. Our findings indicate that damaged corticospinal pathways due to stroke do not  
316       prevent successful learning. A controlled trial remains to be conducted that examines the effect of damaged  
317       pathways on operant learning and performance.

318           We expected to observe successful down-conditioning of RF since previous work has shown successful  
319       soleus H-reflex down-conditioning (Thompson et al. 2009; Manella et al. 2013). However, in neural operant  
320       conditioning, even across modalities, approximately 30% of individuals are non-learners (Thompson et al. 2009;  
321       Manella et al. 2013; Sitaram et al. 2017). Although only 7 individuals were included in our cohort, there were no  
322       non-responders, suggesting the potential for a robust operant conditioning paradigm. Our analysis of 6 baseline  
323       sessions showed no evidence of spontaneous decrease in H-reflex amplitude that could be mistaken as down-  
324       conditioning. Further, there is no evidence of spontaneous decrease in H-reflex amplitude over sessions in  
325       previous work (Thompson et al. 2009). Thus, it is highly unlikely that RF H-reflex spontaneously decreased over  
326       time.

327           Trials conducted without feedback, control trials, provide a window into long-term plasticity. Overall,  
328       we observed a decrease in all individuals ( $21 \pm 6(\text{SE}) \%$ ), where the drop in post-stroke individuals ( $S1 = 25\%$ ,  
329        $S2 = 40\%$ ) was more evident than that of the healthy group (16 %). These results align with earlier findings, where

330 the drop of control H-reflex of the soleus was larger in participants with spinal cord injury (24%) than healthy  
331 individuals (16%) (Thompson et al. 2013). This difference is attributed to the hypothesis of negotiated equilibrium  
332 (Wolpaw 2018), the concept that neural circuitry already behaving well will not be affected by neuromodulation,  
333 but neurologically affected circuitry will.

334 We found that operant conditioning based on femoral nerve stimulation generalized to other innervated  
335 quadriceps muscles. Additional monitoring of adjacent quadriceps muscles (VM and VL) was performed to  
336 validate the specificity of RF operant H-reflex conditioning. We found a significant drop in VM and VL in healthy  
337 individuals between the first and last 6 sessions. Although not conclusive, these results suggest that operant  
338 conditioning based on stimulation of a peripheral nerve that innervates multiple muscles may affect the entire  
339 muscle group. Animal studies by Chen et al. (Chen et al. 2011) found that operant conditioning of the soleus  
340 affected quadriceps H-reflex excitability, and as such the generalization of operant conditioning to multiple  
341 muscles, especially innervated by the same nerve, was expected. The degree of generalization will indicate the  
342 specificity of the effect of training and needs to be characterized further.

343 We found functional changes in gait in the post-stroke individuals following training. These results align  
344 with earlier studies that have shown functional improvement following the operant H-reflex conditioning. Chen  
345 et al. (2006) have shown rats with incomplete spinal cord injury (SCI) improved gait asymmetry following the  
346 training. The studies by Thompson et al. and Manella et al. (Manella et al. 2013; Thompson et al. 2013) have  
347 shown gait improvements (i.e., speed, endurance, less clonus, easier stepping etc.) in people with SCI. Most  
348 recently, Tahayori and Koceja (2019) have shown 3 post-stroke individuals were able to down-regulate their  
349 soleus H-reflex and the changes were correlated with movement improvements. In our study, S1 exhibited  
350 improvements in knee ROM and knee flexion velocity in both overground and treadmill walking conditions, but  
351 S2 only showed improvements in knee kinematics only in overground walking. Both participants exhibited better  
352 improvements during overground walking than treadmill walking. Overground walking was measured during 10m  
353 walk test, where the participants were asked to set their speed with the maximum effort. No wiring from EMG  
354 sensors or the stimulator was attached, and a belt type harness was worn. In contrast, during treadmill walking,  
355 participants had to walk in a fixed and self-selected speed that was predetermined, the wiring from EMG sensors  
356 and stimulator was present, a full-body harness had to be worn, and no gait support devices (i.e., cane, rolling  
357 walker) were allowed. Thus, it is possible that the differences between overground and treadmill walking could

358 be due to the experimental setup. Clinical and laboratory measurements of hyperreflexia showed improvements  
359 in both post-stroke individuals. S1 improved in QRTA, while we did not observe a change in QRTA of S2. Further,  
360 H-reflex amplitude during different gait cycle phases also decreased, suggesting generalization of training during  
361 standing to walking (Thompson and Wolpaw 2021). While no conclusions can be drawn across post-stroke  
362 individuals, these results suggest the efficacy of conducting a RF H-reflex down-conditioning clinical trial for  
363 individuals post-stroke with SKG and quadriceps hyperreflexia.

364 This study investigates the feasibility of RF H-reflex down-conditioning based on 7 individuals, 2 of  
365 them post-stroke. One of the main limitations of this study is the small sample size (7). Despite the small sample,  
366 the effect size (3.85) and statistical power (98.7%) were substantial and suggest that running more individuals  
367 would not change our conclusions. Due to training only 2 post-stroke individuals, we cannot generalize the  
368 feasibility in operant conditioning of RF H-reflex conditioning to a larger population. It is interesting that S2  
369 demonstrated improvement in H-reflex during gait phases, except for mid-swing, yet did not show as great of a  
370 functional improvement as S1. While the S2 mechanism (cortico-basal ganglia-thalamo-cortical loop pathway)  
371 underlying this change was different than, S1 (corticospinal pathway), it is notable that both participants  
372 successfully down-regulated RF H-reflex. Further investigations should be dedicated to understanding the role  
373 between H-reflex excitability and clinical outcomes.

374

## Conclusions

375

Our observations suggest that RF H-reflex down-conditioning is feasible and generalizes to other

376

quadriceps muscles. The successful training of 2 post-stroke individuals provides promise that one's ability to

377

regulate H-reflex may extend to this neurologically impaired population, but a larger sample size is needed to

378

confirm feasibility, long-term plasticity and clinical effects. These initial results open the door for alternative

379

treatments of spasticity and may lead towards an effective intervention in post-stroke Stiff-Knee gait and other

380

spasticity-related disorders.

## 381 REFERENCES

- 382 Akbas T, Kim K, Doyle K, Manella K, Lee R, Spicer P, Knikou M, Sulzer J. 2020. Rectus  
383 femoris hyperreflexia contributes to Stiff-Knee gait after stroke. *J NeuroEngineering Rehabil.*  
384 17(1):117. doi:10.1186/s12984-020-00724-z.
- 385 Bohannon RW, Smith MB. 1987. Interrater Reliability of a Modified Ashworth Scale of  
386 Muscle Spasticity. *Physical Therapy.* 67(2):206–207. doi:10.1093/ptj/67.2.206.
- 387 Bordlee R, Wong CK. 2015. Surface EMG: A how-to guide for practitioners | Lower  
388 Extremity Review Magazine. [accessed 2021 Nov 2]. [https://lermagazine.com/article/surface-](https://lermagazine.com/article/surface-emg-a-how-to-guide-for-practitioners)  
389 [emg-a-how-to-guide-for-practitioners](https://lermagazine.com/article/surface-emg-a-how-to-guide-for-practitioners).
- 390 Burpee J, Lewek M. 2015. Biomechanical gait characteristics of naturally occurring  
391 unsuccessful foot clearance during swing in individuals with chronic stroke. *Clinical*  
392 *biomechanics (Bristol, Avon).* 30(10). doi:10.1016/j.clinbiomech.2015.08.018. [accessed  
393 2021 Nov 2]. <https://pubmed.ncbi.nlm.nih.gov/26371855/>.
- 394 Carp JS, Tennissen AM, Chen XY, Wolpaw JR. 2006. Diurnal H-reflex variation in mice.  
395 *Exp Brain Res.* 168(4):517–528. doi:10.1007/s00221-005-0106-y.
- 396 Chen XY, Carp JS, Chen L, Wolpaw JR. 2002. Corticospinal tract transection prevents  
397 operantly conditioned H-reflex increase in rats. *Exp Brain Res.* 144(1):88–94.  
398 doi:10.1007/s00221-002-1026-8.
- 399 Chen XY, Wolpaw JR. 1995. Operant conditioning of H-reflex in freely moving rats. *Journal*  
400 *of Neurophysiology.* 73(1):411–415. doi:10.1152/jn.1995.73.1.411.
- 401 Chen Y, Chen L, Wang Y, Wolpaw JR, Chen XY. 2011. Operant Conditioning of Rat Soleus  
402 H-Reflex Oppositely Affects Another H-Reflex and Changes Locomotor Kinematics. *Journal*  
403 *of Neuroscience.* 31(31):11370–11375. doi:10.1523/JNEUROSCI.1526-11.2011.
- 404 Chen Y, Chen XY, Jakeman LB, Chen L, Stokes BT, Wolpaw JR. 2006. Operant  
405 Conditioning of H-Reflex Can Correct a Locomotor Abnormality after Spinal Cord Injury in  
406 Rats. *J Neurosci.* 26(48):12537–12543. doi:10.1523/JNEUROSCI.2198-06.2006.
- 407 Crone C, Johnsen LL, Hultborn H, Ørsnes GB. 1999. Amplitude of the maximum motor  
408 response ( M max ) in human muscles typically decreases during the course of an experiment.  
409 *Experimental Brain Research.* 124(2):265–270. doi:10.1007/s002210050621.
- 410 Dehnadi Moghadam A, Hasanzadeh H, Dehnadi Moghadam F. 2021. Evaluation of the Effect  
411 of Intranasal Lidocaine in the Treatment of Spasticity in Patients with Traumatic Brain  
412 Injury. *Anesth Pain Med.* 11(4):e115849. doi:10.5812/aapm.115849.
- 413 Devetzoglou Toliou S. 2020. Brain-computer interface-based feedback to enhance motor  
414 rehabilitation. [accessed 2022 Jul 14].  
415 [https://repository.tudelft.nl/islandora/object/uuid%3A58e681ae-9a2d-4046-b13f-](https://repository.tudelft.nl/islandora/object/uuid%3A58e681ae-9a2d-4046-b13f-6d33e991af6e)  
416 [6d33e991af6e](https://repository.tudelft.nl/islandora/object/uuid%3A58e681ae-9a2d-4046-b13f-6d33e991af6e).

- 417 Dvorak EM, Ketchum NC, McGuire JR. 2011. The Underutilization of Intrathecal Baclofen  
418 in Poststroke Spasticity. *Topics in Stroke Rehabilitation*. 18(3):195–202.  
419 doi:10.1310/tsr1803-195.  
420
- 421 Fowler EG, Nwigwe AI, Ho TW. 2007. Sensitivity of the pendulum test for assessing  
422 spasticity in persons with cerebral palsy. *Developmental Medicine & Child Neurology*.  
423 42(3):182–189. doi:10.1111/j.1469-8749.2000.tb00067.x.
- 424 Hopkins JT, Ingersoll CD. 2000. Arthrogenic Muscle inhibition: A Limiting Factor in Joint  
425 Rehabilitation. *Journal of Sport Rehabilitation*. 9(2):135–159. doi:10.1123/jsr.9.2.135.
- 426 Kasman G, Wolf S. 2002. SURFACE EMG MADE EASY: A Beginner’s Guide for  
427 Rehabilitation Clinicians. [http://www.noraxon.com/wp-content/uploads/2015/01/nor-](http://www.noraxon.com/wp-content/uploads/2015/01/nor-19surface-emg-manual.pdf)  
428 [19surface-emg-manual.pdf](http://www.noraxon.com/wp-content/uploads/2015/01/nor-19surface-emg-manual.pdf).
- 429 Knikou M. 2006. EFFECTS OF CHANGES IN HIP POSITION ON ACTIONS OF SPINAL  
430 INHIBITORY INTERNEURONS IN HUMANS. *Int J Neurosci*. 116(8):945–961.  
431 doi:10.1080/00207450600675167.
- 432 Kofler M, Quirbach E, Schauer R, Singer M, Saltuari L. 2009. Limitations of Intrathecal  
433 Baclofen for Spastic Hemiparesis Following Stroke. *Neurorehabil Neural Repair*. 23(1):26–  
434 31. doi:10.1177/1545968308317700.
- 435 Lance J. 1980. The control of muscle tone, reflexes, and movement: Robert Wartenberg  
436 Lecture. *Neurology*. 30(12). doi:10.1212/wnl.30.12.1303. [accessed 2021 Nov 1].  
437 <https://pubmed.ncbi.nlm.nih.gov/7192811/>.
- 438 Li S, Francisco GE. 2015. New insights into the pathophysiology of post-stroke spasticity.  
439 *Front Hum Neurosci*. 9:192. doi:10.3389/fnhum.2015.00192.
- 440 Li S, Francisco GE, Zhou P. 2018. Post-stroke Hemiplegic Gait: New Perspective and  
441 Insights. *Front Physiol*. 9:1021. doi:10.3389/fphys.2018.01021.
- 442 Manella KJ, Roach KE, Field-Fote EC. 2013. Operant conditioning to increase ankle control  
443 or decrease reflex excitability improves reflex modulation and walking function in chronic  
444 spinal cord injury. *Journal of Neurophysiology*. 109(11):2666–2679.  
445 doi:10.1152/jn.01039.2011.
- 446 Navarrete-Opazo AA, Gonzalez W, Nahuelhual P. 2016. Effectiveness of Oral Baclofen in  
447 the Treatment of Spasticity in Children and Adolescents With Cerebral Palsy. *Archives of*  
448 *Physical Medicine and Rehabilitation*. 97(4):604–618. doi:10.1016/j.apmr.2015.08.417.
- 449 Palmieri RM, Ingersoll CD, Hoffman MA. 2004. The Hoffmann Reflex: Methodologic  
450 Considerations and Applications for Use in Sports Medicine and Athletic Training Research.  
451 *Journal of Athletic Training*. 39(3):268.
- 452 Perry J. 1992. *Gait analysis : normal and pathological function*. Thorofare, N.J. : SLACK inc.  
453 [accessed 2022 Apr 12]. <http://archive.org/details/gaitanalysisnorm0000perr>.

- 454 Perry J, Burnfield J. 2010. Gait Analysis: Normal and Pathological Function. *J Sports Sci*  
455 *Med.* 9(2):353.
- 456 Pierrot-Deseilligny E, Burke D. 2005. *The Circuitry of the Human Spinal Cord: Its Role in*  
457 *Motor Control and Movement Disorders.* Cambridge: Cambridge University Press.  
458 [https://www.cambridge.org/core/books/circuitry-of-the-human-spinal-](https://www.cambridge.org/core/books/circuitry-of-the-human-spinal-cord/BBDFC31B44453B61DD5FD801B34CFFFF)  
459 [cord/BBDFC31B44453B61DD5FD801B34CFFFF](https://www.cambridge.org/core/books/circuitry-of-the-human-spinal-cord/BBDFC31B44453B61DD5FD801B34CFFFF).
- 460 Platz T, editor. 2021. *Clinical Pathways in Stroke Rehabilitation: Evidence-based Clinical*  
461 *Practice Recommendations.* Cham: Springer International Publishing. [accessed 2021 Oct  
462 29]. <http://link.springer.com/10.1007/978-3-030-58505-1>.
- 463 Robertson JVG, Pradon D, Bensmail D, Fermanian C, Bussel B, Roche N. 2009. Relevance  
464 of botulinum toxin injection and nerve block of rectus femoris to kinematic and functional  
465 parameters of stiff knee gait in hemiplegic adults. *Gait & Posture.* 29(1):108–112.  
466 doi:10.1016/j.gaitpost.2008.07.005.
- 467 Roche N, Zory R, Sauthier A, Bonnyaud C, Pradon D, Bensmail D. 2015. Effect of  
468 rehabilitation and botulinum toxin injection on gait in chronic stroke patients: A randomized  
469 controlled study. *J Rehabil Med.* 47(1):31–37. doi:10.2340/16501977-1887.
- 470 Sitaram R, Ros T, Stoeckel L, Haller S, Scharnowski F, Lewis-Peacock J, Weiskopf N,  
471 Blefari ML, Rana M, Oblak E, et al. 2017. Closed-loop brain training: the science of  
472 neurofeedback. *Nat Rev Neurosci.* 18(2):86–100. doi:10.1038/nrn.2016.164.
- 473 Skinner BF. 1951. How to Teach Animals. *Scientific American.* 185(6):26–29.
- 474 Stoquart GG, Detrembleur C, Palumbo S, Deltombe T, Lejeune TM. 2008. Effect of  
475 Botulinum Toxin Injection in the Rectus Femoris on Stiff-Knee Gait in People With Stroke:  
476 A Prospective Observational Study. *Archives of Physical Medicine and Rehabilitation.*  
477 89(1):56–61. doi:10.1016/j.apmr.2007.08.131.
- 478 Stutzig N, Siebert T. 2017. Assessment of the H-reflex at two contraction levels before and  
479 after fatigue. *Scandinavian Journal of Medicine & Science in Sports.* 27(4):399–407.  
480 doi:10.1111/sms.12663.
- 481 Tahayori B, Koceja D. 2019. Exercise induced operant conditioning of the H-reflex in stroke  
482 patients: Hopes for improving motor function through inducing plastic changes in the spinal  
483 pathways. *J Neurol Neurol Sci Disord.*:001–005. doi:10.17352/jnnsd.0000026.
- 484 Thompson AK, Chen XY, Wolpaw JR. 2009. Acquisition of a Simple Motor Skill: Task-  
485 Dependent Adaptation Plus Long-Term Change in the Human Soleus H-Reflex. *Journal of*  
486 *Neuroscience.* 29(18):5784–5792. doi:10.1523/JNEUROSCI.4326-08.2009.
- 487 Thompson AK, Pomerantz FR, Wolpaw JR. 2013. Operant Conditioning of a Spinal Reflex  
488 Can Improve Locomotion after Spinal Cord Injury in Humans. *Journal of Neuroscience.*  
489 33(6):2365–2375. doi:10.1523/JNEUROSCI.3968-12.2013.
- 490 Thompson AK, Wolpaw JR. 2021. H-reflex conditioning during locomotion in people with  
491 spinal cord injury. *J Physiol.* 599(9):2453–2469. doi:10.1113/JP278173.

- 492 Vloka J, Hadzic A, Gautier P. 2018. Femoral Nerve Block - Landmarks and Nerve Stimulator  
493 Technique. NYSORA. [accessed 2021 Nov 2]. [https://www.nysora.com/techniques/lower-](https://www.nysora.com/techniques/lower-extremity/femoral/femoral-nerve-block/)  
494 [extremity/femoral/femoral-nerve-block/](https://www.nysora.com/techniques/lower-extremity/femoral/femoral-nerve-block/).
- 495 Wissel J, Ward A, Erztgaard P, Bensmail D, Hecht M. European consensus table on the use  
496 of botulinum toxin type A in adult spasticity. doi:10.2340/16501977-0303. [accessed 2022  
497 Apr 18]. <http://medicaljournals.se/jrm/content/abstract/10.2340/16501977-0303>.
- 498 Wolpaw JR. 2018. The negotiated equilibrium model of spinal cord function. *The Journal of*  
499 *Physiology*. 596(16):3469–3491. doi:10.1113/JP275532.
- 500 Wolpaw JR, Braitman DJ, Seegal RF. 1983. Adaptive plasticity in primate spinal stretch  
501 reflex: Initial development. *Journal of Neurophysiology*. 50(6):1296–1311.
- 502 Wolpaw JR, Lee CL. 1987. Motoneuron response to dorsal root stimulation in anesthetized  
503 monkeys after spinal cord transection. *Exp Brain Res*. 68(2). doi:10.1007/BF00248809.  
504 [accessed 2021 Nov 2]. <http://link.springer.com/10.1007/BF00248809>.
- 505 Young RR, Wiegner AW. 1987. Spasticity. *Clin Orthop Relat Res*.(219):50–62.
- 506
